# Supplementary material
Source: publisher site journal article supplement (https://www.dovepress.com/article/598576)
Supplement: Supplementary file 1 [file Supplementary%20information.pdf]

**Supplementary Table S1. Volume-matched wound infiltration protocol and corresponding study-drug doses by number of operated lumbar segments.**

| <b>Operated segments (n)</b> | <b>Total infiltration volume (mL)</b> | <b>LB+B group: liposomal bupivacaine volume (mL)</b> | <b>LB+B group: liposomal bupivacaine dose (mg)</b> | <b>LB+B group: 0.5% bupivacaine volume (mL)</b> | <b>LB+B group: plain bupivacaine dose (mg)</b> | <b>RH group: 0.5% ropivacaine volume (mL)</b> | <b>RH group: ropivacaine dose (mg)</b> |
|------------------------------|---------------------------------------|------------------------------------------------------|----------------------------------------------------|-------------------------------------------------|------------------------------------------------|-----------------------------------------------|----------------------------------------|
| 2                            | 20                                    | 10                                                   | 133.0                                              | 10                                              | 50.0                                           | 20                                            | 100.0                                  |
| 3                            | 30                                    | 15                                                   | 199.5                                              | 15                                              | 75.0                                           | 30                                            | 150.0                                  |
| 4                            | 40                                    | 20                                                   | 266.0                                              | 20                                              | 100.0                                          | 40                                            | 200.0                                  |

Liposomal bupivacaine: bupivacaine liposome injection (Hengrui Pharmaceutical Co., Ltd., Jiangsu, China), 10 mL:133 mg (13.3 mg/mL).

0.5% bupivacaine hydrochloride = 5 mg/mL; 0.5% ropivacaine hydrochloride = 5 mg/mL.

LB+B mixture was prepared 1:1 (v/v); thus, each component accounts for 50% of the total volume (final mixture: 6.65 mg/mL liposomal bupivacaine + 2.5 mg/mL plain bupivacaine).

Total infiltration volume was standardized as 10 mL per operated lumbar segment in both groups (volume-matched).

Dose (mg) = volume (mL) × concentration (mg/mL); values may be rounded.

**Supplementary Table S2. Model-based estimated marginal means (EMMs) and exploratory time-point contrasts**

| <b>Outcome</b>          | <b>Time (h)</b> | <b>LB+B EMM (95% CI)</b> | <b>RH EMM (95% CI)</b> | <b>Diff RH-LB+B (95% CI)</b> | <b><i>p</i></b> | <b><i>p</i> (Holm)</b> | <b><i>p</i> (FDR)</b> |
|-------------------------|-----------------|--------------------------|------------------------|------------------------------|-----------------|------------------------|-----------------------|
| Rest pain-VAS Scores    | 2               | 0.85 (0.63–1.06)         | 1.12 (0.81–1.43)       | 0.27 (-0.11–0.65)            | 0.163           | 0.735                  | 0.407                 |
| Rest pain-VAS Scores    | 6               | 1.01 (0.74–1.27)         | 1.32 (0.99–1.66)       | 0.32 (-0.11–0.74)            | 0.147           | 0.735                  | 0.407                 |
| Rest pain-VAS Scores    | 24              | 1.14 (0.92–1.37)         | 1.30 (1.01–1.58)       | 0.15 (-0.21–0.52)            | 0.406           | 1.000                  | 0.676                 |
| Rest pain-VAS Scores    | 48              | 1.44 (1.22–1.66)         | 1.40 (1.14–1.66)       | -0.04 (-0.38–0.30)           | 0.823           | 1.000                  | 0.823                 |
| Rest pain-VAS Scores    | 72              | 1.58 (1.35–1.80)         | 1.66 (1.38–1.94)       | 0.08 (-0.28–0.44)            | 0.660           | 1.000                  | 0.823                 |
| Dynamic pain-VAS Scores | 2               | 2.24 (1.95–2.53)         | 2.63 (2.30–2.96)       | 0.39 (-0.06–0.83)            | 0.088           | 0.439                  | 0.439                 |
| Dynamic pain-VAS Scores | 6               | 2.54 (2.21–2.86)         | 2.50 (2.23–2.76)       | -0.04 (-0.46–0.38)           | 0.858           | 1.000                  | 0.858                 |
| Dynamic pain-VAS Scores | 24              | 2.70 (2.44–2.95)         | 2.86 (2.55–3.17)       | 0.16 (-0.24–0.56)            | 0.426           | 1.000                  | 0.540                 |
| Dynamic pain-VAS Scores | 48              | 2.90 (2.66–3.14)         | 3.06 (2.74–3.39)       | 0.16 (-0.24–0.57)            | 0.432           | 1.000                  | 0.540                 |
| Dynamic pain-VAS Scores | 72              | 3.20 (2.91–3.48)         | 3.47 (3.13–3.82)       | 0.28 (-0.17–0.72)            | 0.225           | 0.898                  | 0.540                 |

EMMs and contrasts were derived from the baseline-adjusted GEE models (Exchangeable working correlation; robust SEs). EMMs were estimated at the overall mean baseline VAS. Holm-adjusted *p* values control the family-wise error rate across the five time-point contrasts within each outcome; FDR *p* values are Benjamini-Hochberg adjusted.

**Supplementary Table S3**

**Comparison between patients assigned to LB+B Group and patients assigned to RH Group on pain score and opioid consumption over the initial 3 postoperative days.**

| Time point                      | LB+B Group<br>(N=44), n (%) |           |          | RH Group<br>(N=39), n (%) |           |          | Cliff's delta<br>(95% CI) <sup>a</sup> | p value |
|---------------------------------|-----------------------------|-----------|----------|---------------------------|-----------|----------|----------------------------------------|---------|
|                                 | No-pain                     | Mild      | Moderate | No-pain                   | Mild      | Moderate |                                        |         |
| Rest pain-VAS Scores            |                             |           |          |                           |           |          |                                        |         |
| Preoperative                    | 7 (15.9)                    | 36(81.8)  | 1 (2.3)  | 1 (2.6)                   | 38(97.4)  | 0 (0.0)  | -0.05 (-0.28, 0.18)                    | 0.697   |
| Postoperative                   |                             |           |          |                           |           |          |                                        |         |
| Postop-2h                       | 16(36.4)                    | 28 (63.6) | 0 (0.0)  | 11(28.2)                  | 27 (69.2) | 1 (2.6)  | -0.14 (-0.37, 0.08)                    | 0.241   |
| Postop-6h                       | 14(31.8)                    | 29(65.9)  | 1 (2.3)  | 10 (25.6)                 | 28(71.8)  | 1 (2.6)  | -0.17 (-0.40, 0.04)                    | 0.156   |
| Postop-24h                      | 9(20.5)                     | 35 (79.5) | 0 (0.0)  | 8(20.5)                   | 30(76.9)  | 1 (2.6)  | -0.11 (-0.34, 0.12)                    | 0.371   |
| Postop-48h                      | 5 (11.4)                    | 39 (88.6) | 0 (0.0)  | 6 (15.4)                  | 33(84.6)  | 0 (0.0)  | 0.02 (-0.22, 0.23)                     | 0.902   |
| Postop-72h                      | 3 (6.8)                     | 40 (90.9) | 1 (2.3)  | 4 (10.3)                  | 35(89.7)  | 0 (0.0)  | -0.08(-0.31, 0.14)                     | 0.508   |
| Dynamic pain-VAS Scores         |                             |           |          |                           |           |          |                                        |         |
| Preoperative                    | 1(2.3)                      | 26(59.1)  | 17(38.6) | 0(0.0)                    | 24(61.5)  | 15(38.5) | -0.09(-0.32, 0.14)                     | 0.436   |
| Postoperative                   |                             |           |          |                           |           |          |                                        |         |
| Postop-2h                       | 2(4.5)                      | 38(86.4)  | 4(9.1)   | 0(0.0)                    | 32(82.1)  | 7(17.9)  | -0.20 (-0.43, 0.02)                    | 0.098   |
| Postop-6h                       | 1(2.3)                      | 39(88.6)  | 4(9.1)   | 0(0.0)                    | 35(89.7)  | 4(10.3)  | -0.04 (-0.29, 0.20)                    | 0.711   |
| Postop-24h                      | 0(0.0)                      | 37(84.1)  | 7(15.9)  | 0(0.0)                    | 33 (84.6) | 6(15.4)  | -0.10(-0.35, 0.13)                     | 0.419   |
| Postop-48h                      | 0(0.0)                      | 36(81.8)  | 8(18.2)  | 0(0.0)                    | 26(66.7)  | 13(33.3) | -0.09(-0.33, 0.15)                     | 0.463   |
| Postop-72h                      | 0(0.0)                      | 31(70.5)  | 13(29.5) | 0(0.0)                    | 24(61.5)  | 15(38.5) | -0.14 (-0.38, 0.09)                    | 0.255   |
| Rescue analgesian,n(%)          |                             |           |          |                           |           |          |                                        |         |
| Yes                             | 21(47.73)                   |           |          | 22(56.41)                 |           |          | Relative risk <sup>b</sup>             | 0.429   |
| No                              | 23(52.27)                   |           |          | 17(43.59)                 |           |          | 0.85(0.56,1.29)                        |         |
| Rescue opioid consumption (MME) | 0(0, 10)                    |           |          | 0(0, 10)                  |           |          |                                        | 0.727   |

VAS categories were defined as: no pain = 0; mild = 1-3; moderate = 4-6; severe = 7-10. Opioid consumption refers to ward-based rescue tramadol exposure converted to MME over the initial 48 h; flurbiprofen axetil was not included in the MME calculation. PCIA-delivered sufentanil was reported separately.

<sup>a</sup> Statistical analysis for VAS score (non-normally distributed) was performed using the Cliff's delta via bootstrap resampling (1000 iterations) to quantify the effect size for ordinal categorical data.

<sup>b</sup> Relative risk was estimated from generalized linear regression model with log link.
